# Supplementary material for: Inanspruchnahme psychiatrisch-psychotherapeutischer Versorgung in Deutschland während des ersten Jahres der COVID-19-Pandemie – systematischer Review und Metaanalyse
Source: Springer Nature journal article supplement (doi:10.1007/s00115-025-01812-y), 2025-03-07
Supplement: MOESM1 [file 115_2025_1812_MOESM1_ESM.pdf]

| Studien                 | Setting                         | Studienzeiträume     |                  |                                                                 |                                                               |                                                                | Ergebnismaße                                                                                                                                       | Studienteilnehmer in der Auswertung       |                  | Diagnosen (ICD-10)           |
|-------------------------|---------------------------------|----------------------|------------------|-----------------------------------------------------------------|---------------------------------------------------------------|----------------------------------------------------------------|----------------------------------------------------------------------------------------------------------------------------------------------------|-------------------------------------------|------------------|------------------------------|
|                         |                                 | vor Pandemie         | während Pandemie |                                                                 |                                                               |                                                                |                                                                                                                                                    | Vor Pandemie                              | während Pandemie |                              |
|                         |                                 |                      | ganz-jährig      | 1. Lockdown                                                     | zwischen Lockdowns                                            | 2. Lockdown                                                    |                                                                                                                                                    |                                           |                  |                              |
| Adam et al. 2023        | Notaufnahme                     | 09/2019 bis 02/2020  | -                | -                                                               | -                                                             | 09/2020 bis 02/2021                                            | Anzahl psychiatrischer Vorstellungen (Neudiagnosen) in psychiatrischer Notaufnahme                                                                 | 1.370                                     | 1.249            | F0, F1, F2, F3, F4, F6       |
| Adorjan et al. 2021     | stationär                       | 04/2019 bis 05/2019  | -                | 04/ 2020 bis 05/ 2020                                           | -                                                             | -                                                              | stationäre und teilstationäre psychiatrische Belegung in 38 Kliniken                                                                               | 6.840                                     | 4.218            | gesamt                       |
| Baum et al. 2024        | stationär/ ambulant/ Medikation | 01/ 2019 bis 12/2019 | +                | Stationär: 03/ 2020 bis 05/ 2020; ambulant: 04/2020 bis 06/2020 | Stationär: 06/2020 bis 11/2020; ambulant: 07/2020 bis 09/2020 | Stationär: 12/2020 bis 02/2021; ambulant: 09/2020 bis 12/ 2020 | Anzahl vollstationärer Fälle, ambulant gestellter Diagnosen, Psychopharmaka-Verordnung in DDD – AOKPlus & BKK Daten von KH aus allen Bundesländern | Stationär: 162.905<br>Ambulant: 2.131.186 |                  | F10-F45                      |
| Engels et al. 2022      | stationär/ Medikation           | 01/2019 bis 12/2019  | +                | 03/2020 bis 05/ 2020                                            | 06/2020 bis 11/2020                                           | 12/2020                                                        | Anzahl der vollstationären Fälle und Psychopharmaka-Verordnung in DDD - AOK Daten von KH aus allen Bundesländern                                   | 427.811                                   | 368.543          | F00-F89                      |
| Fasshauer et al. 2021a  | stationär                       | 03/2019 bis 05/2019  | -                | 03/2020 bis 05/2020                                             | -                                                             | -                                                              | Anzahl stationäre Einweisungen wegen psychischer Störungen, Krankenhaus-verweildauer in 67 KH                                                      | 4.775                                     | 3.327            | F00-F69                      |
| Fasshauer et al. 2021b  | stationär                       | 01/2019 bis 12/2019  | +                | -                                                               | -                                                             | -                                                              | Anzahl der stationären Einweisungen wegen psychischer Störungen, in 13 Krankenhäusern                                                              | 22.251                                    | 19.691           | F00-F99 (F0, F1, F2, F3, F4) |
| Fasshauer et al. 2022   | stationär                       | 01/2018 bis 12/2019  | +                | 04/2020 bis 06/2020                                             | 07/2020 bis 09/2020                                           | 09/2020 bis 12/2020                                            | Anzahl vollstationärer Notfalleinweisungen; Krankenhaus-Verweildauer in „mehreren“ psychiatrischen Krankenhäusern                                  | 50.943 (mit 2018)<br>25.404 (nur 2019)    | 22.469           | F00-F69                      |
| Goldschmidt et al. 2023 | Notaufnahme                     | 03/2019 bis 05/2019  | -                | 03/2020 bis 05/2020                                             | -                                                             | -                                                              | Anzahl Vorstellungen in einer psychiatrischen Notaufnahme                                                                                          | 894                                       | 813              | F0, F1, F2, F3, F4, F6       |

|                         |             |                                           |   |                     |   |                     |                                                                                                                                     |           |           |                        |
|-------------------------|-------------|-------------------------------------------|---|---------------------|---|---------------------|-------------------------------------------------------------------------------------------------------------------------------------|-----------|-----------|------------------------|
| Goldschmidt et al. 2024 | Notaufnahme | 09/2019 bis 02/2020                       | - | 03/2020 bis 05/2020 | - | 09/2020 bis 02/2021 | Anzahl Vorstellungen und Einweisungen in psychiatrischer Notaufnahme                                                                | 1.855     | 1.900     | F0, F1, F2, F3, F4, F6 |
| Kippe et al. 2023       | Notaufnahme | 03/2019 bis 05/2019 & 09/2019 bis 02/2020 | - | 03/2020 bis 05/2020 | - | 09/2020 bis 02/2021 | Vorstellungen in psychiatrischer Notaufnahme                                                                                        | 2.189     | 1.921     | F0, F1, F2, F3, F4, F6 |
| Kriner et al. 2023      | Medikation  | 01/2019 bis 12/2019                       | + | -                   | - | -                   | Lithium-Verschreibungen auf 26 psychiatrischen Stationen                                                                            | 549       | 437       | gesamt                 |
| Ludwig et al. 2022      | Medikation  | 01/2019 bis 12/2019                       | + | -                   | - | -                   | Verordnungen von Psychopharmaka<br>Verordnungsvolumen in DDD                                                                        | -         | -         | gesamt                 |
| Mangiapane et al. 2022  | ambulant    | 01/2019 bis 05/2020                       | - | 01/2020 bis 05/2020 | - | -                   | Anzahl psychotherapeutischer Behandlungsfälle (Einzel- und Gruppentherapien) aus Daten von 16 der 17 Kassenärztlichen Vereinigungen | 3.896.892 | 3.796.335 | gesamt                 |
| Seifert et al. 2021     | Notaufnahme | 03/2019 bis 05/2019                       | - | 03/2020 bis 05/2020 | - | -                   | Psychiatrische Notfallvorstellungen in der Notaufnahme eines akademischen Lehrkrankenhauses                                         | 476       | 374       | F1, F2, F3, F4, F6     |
| Sobetzko et al. 2021    | Notaufnahme | 03/2019 bis 05/2019                       | - | 03/2020 bis 05/2020 | - | -                   | Häufigkeit von Vorstellungen und Diagnoseverteilung in Notaufnahme mit psychiatrischem Versorgungsauftrag                           | 374       | 387       | F1, F2, F3, F4, F6     |
| Ullrich et al. 2023     | Notaufnahme | 03/2019 bis 05/2019                       | - | 03/2020 bis 05/2020 | - | -                   | Anzahl psychiatrischer Notfallvorstellungen in einer Notaufnahme                                                                    | 351       | 271       | gesamt                 |
| Zielasek et al. 2021    | stationär   | 03/2019 bis 05/2019                       | - | 03/2020 bis 05/2020 | - | -                   | Anzahl stationärer Aufnahmen in 9 psychiatrischen Krankenhäusern                                                                    | 14.067    | 10.545    | F1, F2, F3, F4, F6     |

**Tab. e1: Die in die Metaanalyse eingeschlossenen 17 Studien.**



|            | Random Effect Model    | RR 0,87; 95% KI [0,79; 0,95]; I <sup>2</sup> 63,4%; t <sup>2</sup> 0,0077 |              |        | -    |              |        | RR 0,94; 95% KI [0,87;1,03]; I <sup>2</sup> 74,9%; t <sup>2</sup> 0,0037 |             |        | -                                                                        |              |        |   |   |
|------------|------------------------|---------------------------------------------------------------------------|--------------|--------|------|--------------|--------|--------------------------------------------------------------------------|-------------|--------|--------------------------------------------------------------------------|--------------|--------|---|---|
| Ambulant   | Baum et al. 2024       | 0,90                                                                      | [0,89; 0,91] | 0,0028 | 0,94 | [0,93; 0,94] | 0,0029 | 1,00                                                                     | [0,99; 1,0] | 0,0031 | 0,95                                                                     | [0,94; 0,96] | 0,0014 | A | 6 |
|            | Mangiapane et al. 2022 | 0,97                                                                      | [0,97; 0,97] | 0,0007 | -    | -            | -      | -                                                                        | -           | -      | -                                                                        | -            | -      | A | 6 |
| Medikation | Kriner et al. 2023*    | -                                                                         | -            | -      | -    | -            | -      | -                                                                        | -           | -      | 0,79                                                                     | [0,78; 0,90] | 0,0506 | B | 6 |
|            | Baum et al. 2024       | -                                                                         | -            | -      | -    | -            | -      | -                                                                        | -           | -      | 1,02                                                                     | [0,81; 1,29] | 0,1204 | A | 6 |
|            | Engels et al. 2022     | -                                                                         | -            | -      | -    | -            | -      | -                                                                        | -           | -      | 0,93                                                                     | [0,93; 0,93] | 0,0001 | A | 6 |
|            | Ludwig et al. 2022     | -                                                                         | -            | -      | -    | -            | -      | -                                                                        | -           | -      | 1,03                                                                     | [1,03; 1,03] | 0,0001 | A | 6 |
|            | Random Effect Model    | -                                                                         |              |        | -    |              |        | -                                                                        |             |        | RR 0,99; 95% KI [0,90; 1,07]; I <sup>2</sup> 100%; t <sup>2</sup> 0,0041 |              |        |   |   |

\* aufgrund des abweichenden Ergebnismaßes wurde die Studie nicht in die Meta-Analyse einbezogen

RR: Relatives Risiko; KI: Konfidenzintervall; SF: Standardfehler; mNOS: modifizierte Newcastle-Ottawa-Skala

Tab. e2: signifikante Verringerung der stationären Inanspruchnahme

| Diagnose  | Studie                 | 1. Lockdown                                                                |              |        | Zwischen Lockdowns |              |        | 2. Lockdown |              |        | Das gesamte Jahr                                                          |              |        | Beobachtungsebene | mNOS |
|-----------|------------------------|----------------------------------------------------------------------------|--------------|--------|--------------------|--------------|--------|-------------|--------------|--------|---------------------------------------------------------------------------|--------------|--------|-------------------|------|
|           |                        | RR                                                                         | 95% KI       | SF     | RR                 | 95% KI       | SF     | RR          | 95% KI       | SF     | RR                                                                        | 95% KI       | SF     |                   |      |
| ICD-10 F0 | Baum et al. 2024       | -                                                                          | -            | -      | -                  | -            | -      | -           | -            | -      | -                                                                         | -            | -      | A                 | 6    |
|           | Engels et al. 2022     | 0,76                                                                       | [0,74; 0,78] | 0,0122 | 0,90               | [0,88; 0,91] | 0,0097 | 0,85        | [0,81; 0,90] | 0,0236 | 0,87                                                                      | [0,86; 0,88] | 0,0067 | A                 | 6    |
|           | Fasshauer et al. 2021a | 0,69                                                                       | [0,60; 0,79] | 0,0468 | -                  | -            | -      | -           | -            | -      | -                                                                         | -            | -      | B                 | 6    |
|           | Fasshauer et al. 2021b | -                                                                          | -            | -      | -                  | -            | -      | -           | -            | -      | 0,86                                                                      | [0,81; 0,91] | 0,0263 | B                 | 6    |
|           | Fasshauer et al. 2022  | -                                                                          | -            | -      | -                  | -            | -      | -           | -            | -      | 0,85                                                                      | [0,81; 0,90] | 0,0232 | B                 | 6    |
|           | Zielasek et al. 2021   | 1,04                                                                       | [0,92; 1,18] | 0,0652 | -                  | -            | -      | -           | -            | -      | -                                                                         | -            | -      | B                 | 6    |
|           | Random Effect Model    | RR 0,81; 95% KI [0,64; 1,03]; I <sup>2</sup> 92,4%; t <sup>2</sup> 0,0411  |              |        | -                  |              |        | -           |              |        | RR 0,87; 95% KI [0,85; 0,88]; I <sup>2</sup> 0,0%; t <sup>2</sup> 0,0     |              |        |                   |      |
| ICD-10 F1 | Baum et al. 2024       | 0,74                                                                       | [0,70; 0,78] | 0,0190 | 0,89               | [0,86; 0,92] | 0,0154 | 0,73        | [0,69; 0,76] | 0,0193 | 0,68                                                                      | [0,66; 0,70] | 0,0084 | A                 | 6    |
|           | Engels et al. 2022     | 0,74                                                                       | [0,73; 0,75] | 0,0055 | 0,85               | [0,84; 0,86] | 0,0042 | 0,76        | [0,74; 0,78] | 0,0102 | 0,84                                                                      | [0,83; 0,85] | 0,0030 | A                 | 6    |
|           | Fasshauer et al. 2021a | 0,75                                                                       | [0,70; 0,80] | 0,0244 | -                  | -            | -      | -           | -            | -      | -                                                                         | -            | -      | B                 | 6    |
|           | Fasshauer et al. 2021b | -                                                                          | -            | -      | -                  | -            | -      | -           | -            | -      | 0,89                                                                      | [0,86; 0,92] | 0,0145 | B                 | 6    |
|           | Fasshauer et al. 2022  | -                                                                          | -            | -      | -                  | -            | -      | -           | -            | -      | 0,89                                                                      | [0,87; 0,91] | 0,0120 | B                 | 6    |
|           | Zielasek et al. 2021   | 0,7                                                                        | [0,66; 0,74] | 0,0192 | -                  | -            | -      | -           | -            | -      | -                                                                         | -            | -      | B                 | 6    |
|           | Random Effect Model    | RR 0,74; 95% KI [0,73; 0,75]; I <sup>2</sup> 26,6%; t <sup>2</sup> <0,0001 |              |        | -                  |              |        | -           |              |        | RR 0,87; 95% KI [0,84; 0,89]; I <sup>2</sup> 99,0%; t <sup>2</sup> 0,0162 |              |        |                   |      |

|           |                        |                                                                           |              |        |      |              |        |      |              |        |                                                                           |              |        |   |   |
|-----------|------------------------|---------------------------------------------------------------------------|--------------|--------|------|--------------|--------|------|--------------|--------|---------------------------------------------------------------------------|--------------|--------|---|---|
| ICD-10 F2 | Baum et al. 2024       | 0,83                                                                      | [0,77; 0,90] | 0,0344 | 0,91 | [0,86; 0,97] | 0,0270 | 0,81 | [0,74; 0,88] | 0,0350 | 0,90                                                                      | [0,86; 0,94] | 0,0188 | A | 6 |
|           | Engels et al. 2022     | 0,86                                                                      | [0,84; 0,88] | 0,0111 | 0,91 | [0,90; 0,93] | 0,0081 | 0,97 | [0,93; 1,02] | 0,0226 | 0,92                                                                      | [0,91; 0,93] | 0,0058 | A | 6 |
|           | Fasshauer et al. 2021a | -                                                                         | -            | -      | -    | -            | -      | -    | -            | -      | -                                                                         | -            | -      | B | 6 |
|           | Fasshauer et al. 2021b | -                                                                         | -            | -      | -    | -            | -      | -    | -            | -      | 0,92                                                                      | [0,87; 0,97] | 0,0241 | B | 6 |
|           | Fasshauer et al. 2022  | -                                                                         | -            | -      | -    | -            | -      | -    | -            | -      | 0,92                                                                      | [0,87; 0,97] | 0,0259 | B | 6 |
|           | Zielasek et al. 2021   | 0,90                                                                      | [0,85; 0,95] | 0,0256 | -    | -            | -      | -    | -            | -      | -                                                                         | -            | -      | B | 6 |
|           | Random Effect Model    | RR 0,87; 95% KI [0,83; 0,90]; I <sup>2</sup> 35,8%; t <sup>2</sup> 0,0002 |              |        | -    |              |        | -    |              |        | RR 0,92; 95% KI [0,91; 0,93]; I <sup>2</sup> 00,0%; t <sup>2</sup> 0      |              |        |   |   |
| ICD-10 F3 | Baum et al. 2024       | 0,77                                                                      | [0,71; 0,83] | 0,0300 | 0,94 | [0,89; 0,99] | 0,0254 | 0,65 | [0,60; 0,70] | 0,0263 | 0,90                                                                      | [0,87; 0,93] | 0,0171 | A | 6 |
|           | Engels et al. 2022     | 0,70                                                                      | [0,69; 0,71] | 0,0073 | 0,89 | [0,87; 0,90] | 0,0062 | 0,84 | [0,81; 0,87] | 0,0156 | 0,86                                                                      | [0,85; 0,87] | 0,0042 | A | 6 |
|           | Fasshauer et al. 2021a | 0,63                                                                      | [0,56; 0,71] | 0,0390 | -    | -            | -      | -    | -            | -      | -                                                                         | -            | -      | B | 6 |
|           | Fasshauer et al. 2021b | -                                                                         | -            | -      | -    | -            | -      | -    | -            | -      | 0,87                                                                      | [0,84; 0,90] | 0,0166 | B | 6 |
|           | Fasshauer et al. 2022  | -                                                                         | -            | -      | -    | -            | -      | -    | -            | -      | 0,93                                                                      | [0,89; 0,97] | 0,0223 | B | 6 |
|           | Zielasek et al. 2021   | 0,64                                                                      | [0,61; 0,67] | 0,0148 | -    | -            | -      | -    | -            | -      | -                                                                         | -            | -      | B | 6 |
|           | Random Effect Model    | RR 0,69; 95% KI [0,63; 0,75]; I <sup>2</sup> 86,6%; t <sup>2</sup> 0,0065 |              |        | -    |              |        | -    |              |        | RR 0,89; 95% KI [0,86; 0,91]; I <sup>2</sup> 79,9%; t <sup>2</sup> 0,0009 |              |        |   |   |
| ICD-10 F4 | Baum et al. 2024       | 0,63                                                                      | [0,58; 0,68] | 0,0403 | 0,86 | [0,82; 0,91] | 0,0263 | 0,62 | [0,57; 0,67] | 0,0412 | 0,82                                                                      | [0,79; 0,85] | 0,0189 | A | 6 |
|           | Engels et al. 2022     | 0,65                                                                      | [0,63; 0,67] | 0,0137 | 0,86 | [0,84; 0,88] | 0,0089 | 0,84 | [0,80; 0,88] | 0,0251 | 0,84                                                                      | [0,83; 0,85] | 0,0064 | A | 6 |

[illegible]

|  |                            |      |              |        |   |   |   |   |   |   |      |              |        |   |   |
|--|----------------------------|------|--------------|--------|---|---|---|---|---|---|------|--------------|--------|---|---|
|  | Fasshauer et al. 2022      | -    | -            | -      | - | - | - | - | - | - | 0,96 | [0,86; 1,07] | 0,0533 | B | 6 |
|  | Zielasek et al. 2021       | 0,73 | [0,63; 0,85] | 0,0564 | - | - | - | - | - | - | -    | -            | -      | B | 6 |
|  | <b>Random Effect Model</b> | -    |              |        | - |   |   | - |   |   | -    |              |        |   |   |

RR: Relatives Risiko; KI: Konfidenzintervall; SF: Standardfehler; mNOS: modifizierte Newcastle-Ottawa-Skala

ICD-10 F0: Organische, einschließlich symptomatischer psychischer Störungen; ICD-10 F1: Psychische und Verhaltensstörungen durch psychotrope Substanzen; ICD-10 F2: Schizophrenie, schizotype und wahnhafte Störungen; ICD-10 F3: Affektive Störungen; ICD-10 F4: Neurotische, Belastungs- und somatoforme Störungen; ICD-10 F5: Verhaltensauffälligkeiten mit körperlichen Störungen und Faktoren; ICD-10 F6: Persönlichkeits- und Verhaltensstörungen

**Tab. e3: unterschiedlich ausgeprägte Effekte (und eine geringere Heterogenität) je nach ICD-10-Diagnose-Kategorie**
